# Supplementary material for: Bimetallic Fe/Co photothermal catalyst for fixing CO2 to cyclic carbonates under atmospheric pressure
Source: Royal Society of Chemistry journal article supplement (doi:10.1039/d4cy00242c), 2024-01-01
Supplement: d4cy00242c1.pdf [file d4cy00242c1.pdf]

**Bimetallic Fe/Co photothermal catalyst for fixing CO<sub>2</sub> to cyclic carbonates under  
atmospheric pressure**

Xuwei Tu<sup>1</sup>, Can Sun<sup>1</sup>, Yang Hu<sup>1</sup>, Yutong Chen<sup>1</sup>, Shouxin Zhu<sup>1</sup>, Jingyi Qu<sup>1</sup>, Zhexiao Zhu<sup>1</sup>, Xiang

Zhang<sup>2\*</sup>, Hui Zheng<sup>1\*</sup>

<sup>1</sup>College of Material, Chemistry and Chemical Engineering, Hangzhou Normal University, Hangzhou 310016, P.R. China

<sup>2</sup>Shanxi Dexinxiang Energy Technology Co., Ltd, Shanxi 710048, P.R. China

E-mail: icezhang@dxxttech.com, huizheng@hznu.edu.cn

**Spectrum data of some compounds**

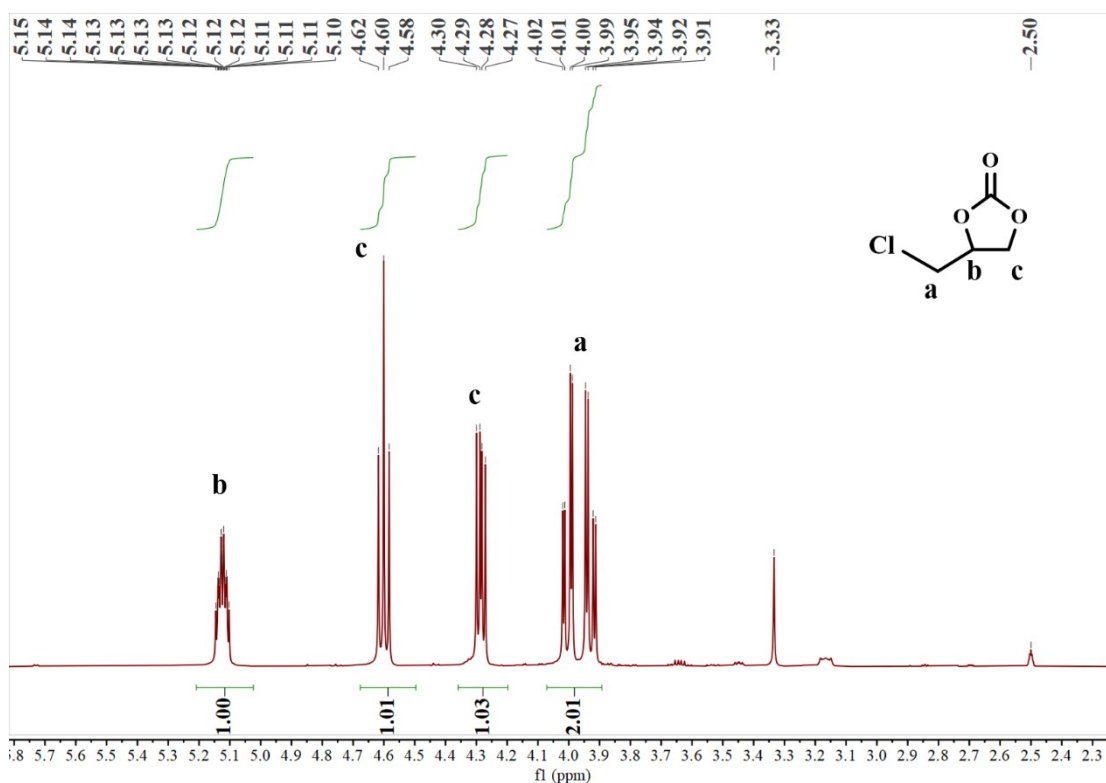

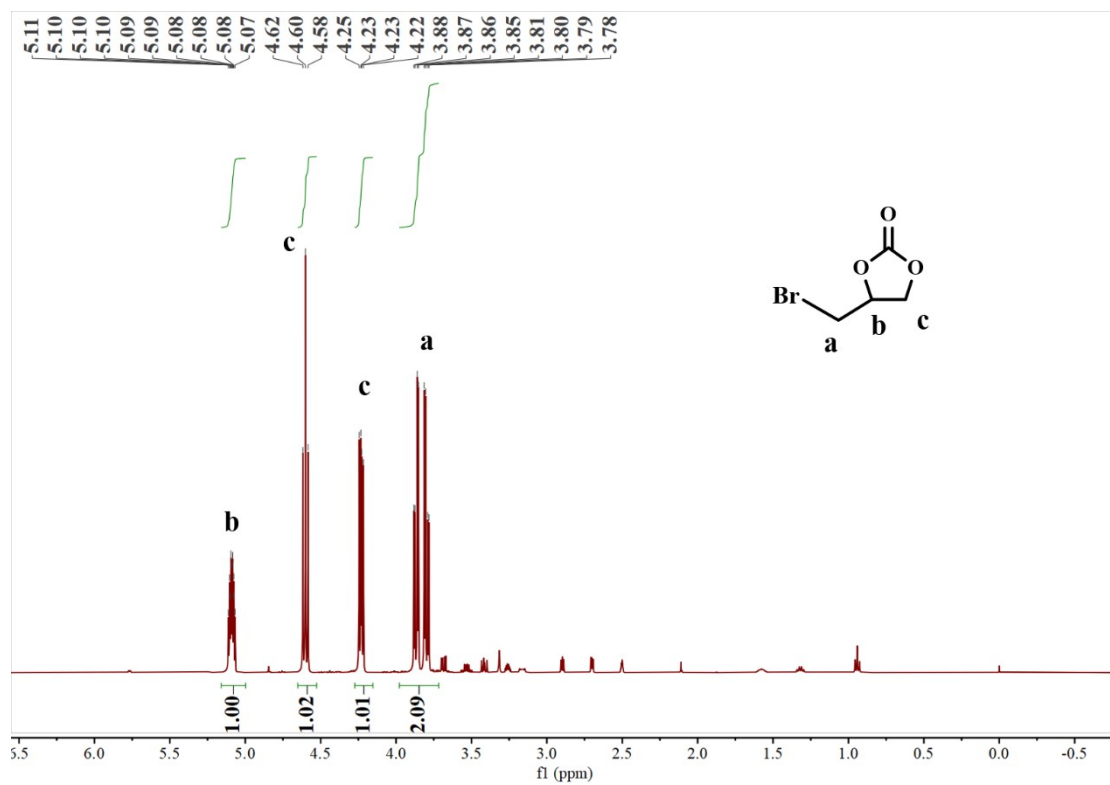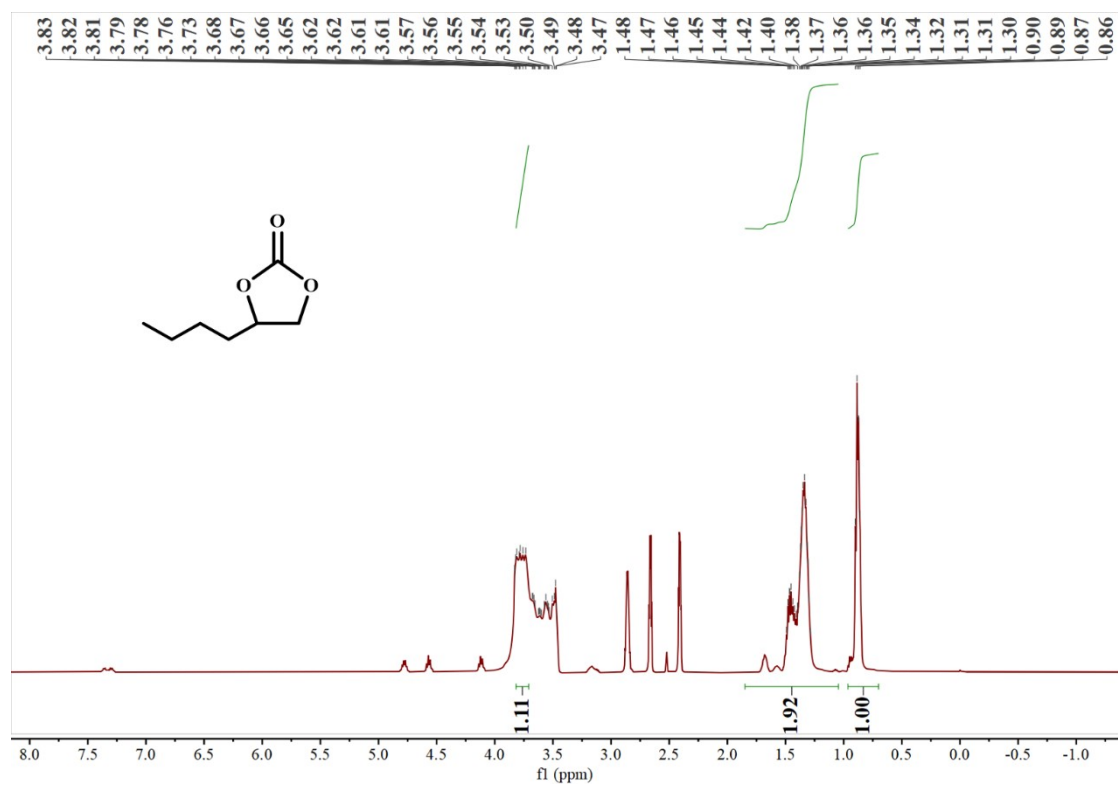

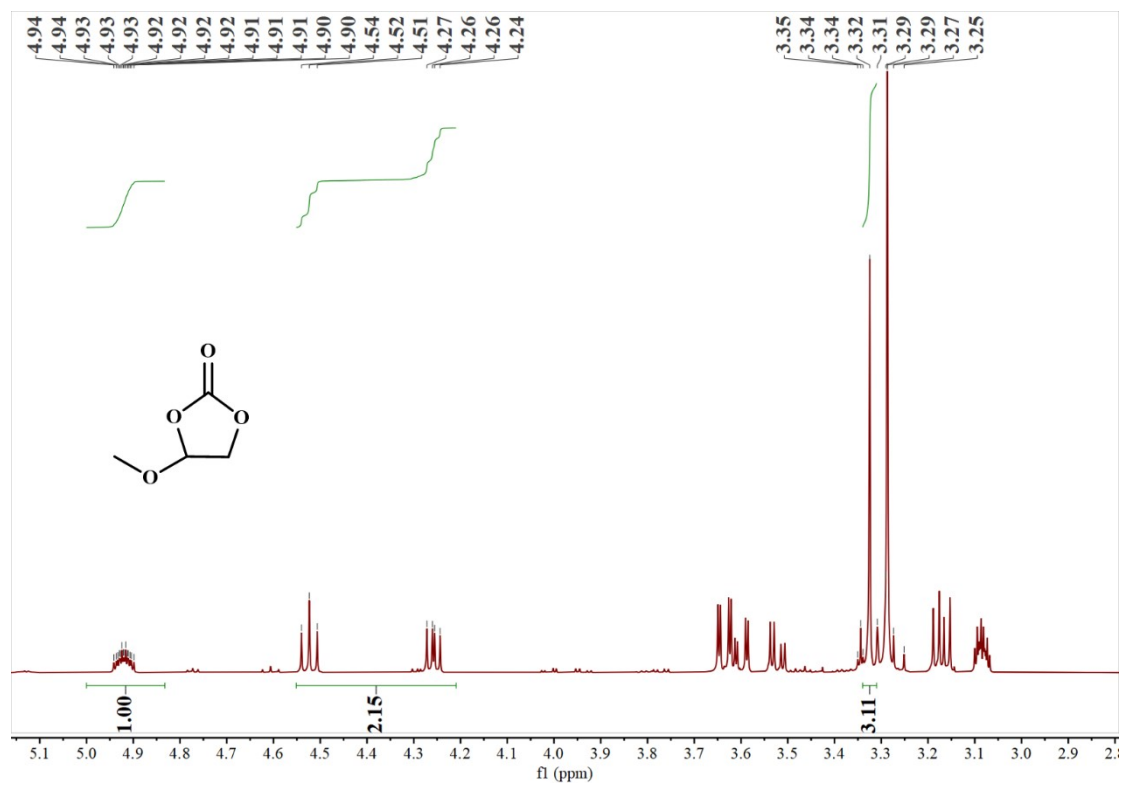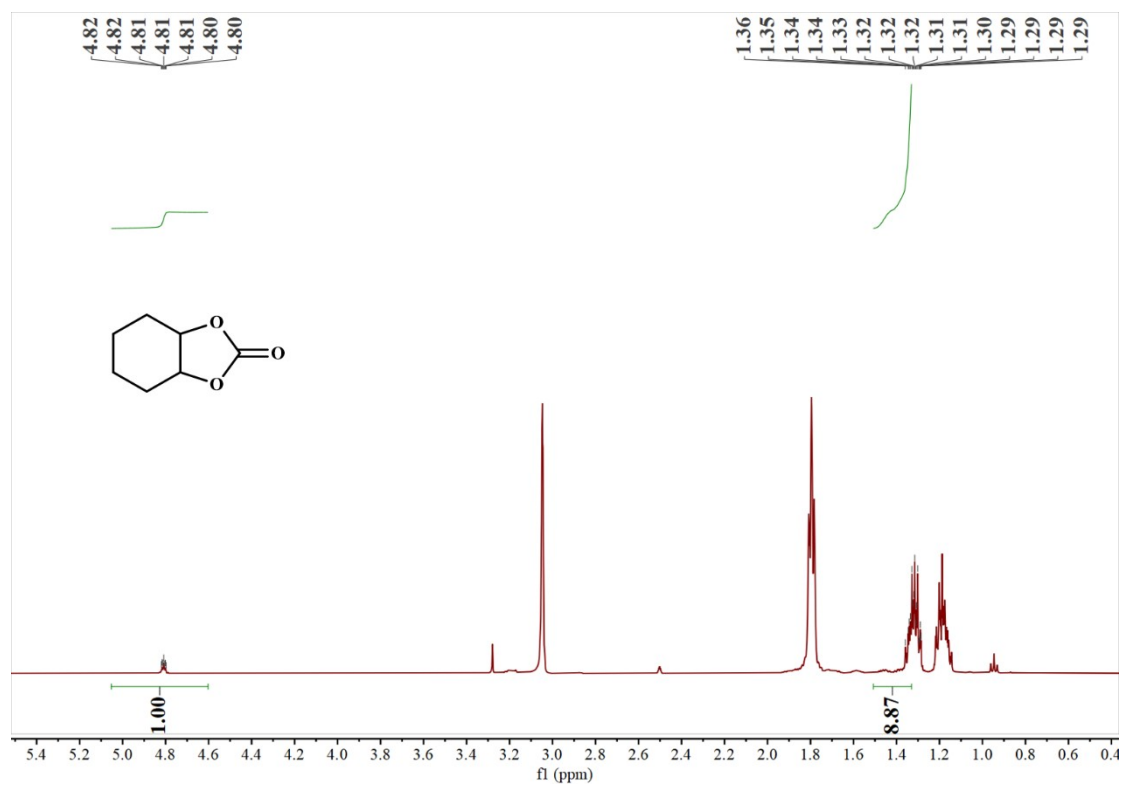

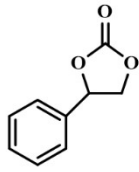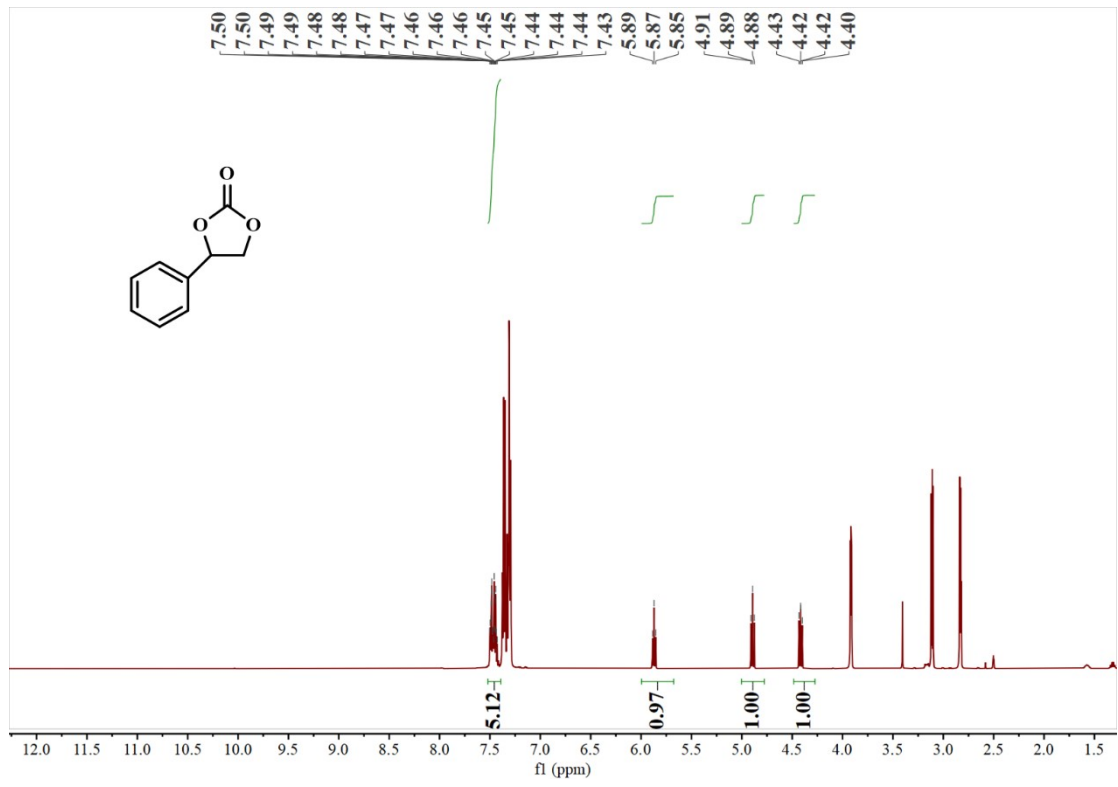

Table S1. Comparison about the recent reports of fixed CO<sub>2</sub> generated cyclic carbonate

| Catalyst                | Epoxides      | P (Mpa) | T (°C) | t (h) | Yield (%) | Ref.      |
|-------------------------|---------------|---------|--------|-------|-----------|-----------|
| Lanthanide coordination |               |         |        |       |           |           |
| polymers                | ECH           | 3.5     | 80     | 4     | 92        | [1]       |
| N/O@C                   | ECH           | 2       | 100    | 12    | 90        | [2]       |
| CNTs-FePMo              | PO            | 0.5     | 65     | 7     | 57        | [3]       |
| Al(koj) <sub>3</sub>    | styrene oxide | 1       | 120    | 10    | 95        | [4]       |
| Al complex/quaternary   |               |         |        |       |           |           |
| ammonium salt           | PO            | 2       | 150    | 24    | 899       | [5]       |
| N4-PIL-2                | ECH           | 0.1     | 100    | 24    | 98        | [6]       |
| [DMPz-4]Br <sub>2</sub> | PO            | 0.5     | 70     | 10    | 87.6      | [7]       |
| Fe <sub>2</sub> Co@BPDC | ECH           | 0.1     | 70     | 9     | 92        | This work |

ECH: Epichlorohydrin; PO: Propylene oxide

## Reference

- [1] M. Sinchow, N. Semakul, T. Konno, A. Rujiwatra, Lanthanide Coordination Polymers through Design for Exceptional Catalytic Performances in CO<sub>2</sub> Cycloaddition Reactions, *ACS Sustainable Chemistry & Engineering*, 9 (2021) 8581-8591.
- [2] B.-H. Cheng, L.-J. Deng, J. Jiang, H. Jiang, Catalytic cycloaddition of CO<sub>2</sub> to epoxides by the synergistic effect of acidity and alkalinity in a functionalized biochar, *Chemical Engineering Journal*,

442 (2022).

[3] T. Al-Garni, N. Al-Jallal, A. Aouissi, Synthesis of Propylene Carbonate from Epoxide and CO<sub>2</sub> Catalyzed by Carbon Nanotubes Supported Fe<sub>1.5</sub>PMo<sub>12</sub>O<sub>40</sub>, *Journal of Chemistry*, 2017 (2017) 1-9.

[4] R. Ma, H. Sun, Y. Cui, Aluminium based binary catalytic system for the solvent free conversion of CO<sub>2</sub> to carbonates with high activity and selectivity, *RSC Adv*, 8 (2018) 11145-11149.

[5] M.R. Li, M.C. Zhang, T.J. Yue, X.B. Lu, W.M. Ren, Highly efficient conversion of CO<sub>2</sub> to cyclic carbonates with a binary catalyst system in a microreactor: intensification of "electrophile-nucleophile" synergistic effect, *RSC Adv*, 8 (2018) 39182-39186.

[6] Y. Zou, Y. Ge, Q. Zhang, W. Liu, X. Li, G. Cheng, H. Ke, Polyamine-functionalized imidazolyl poly(ionic liquid)s for the efficient conversion of CO<sub>2</sub> into cyclic carbonates, *Catalysis Science & Technology*, 12 (2022) 273-281.

[7] J.D. Ndayambaje, I. Shabbir, Q. Zhao, L. Dong, Q. Su, W. Cheng, Controlling dual-positively charged pyrazolium ionic liquids for efficient catalytic conversion of CO<sub>2</sub> into carbonates under mild conditions, *Catalysis Science & Technology*, 14 (2024) 293-305.
